# Supplementary material
Source: publisher site journal article supplement (https://www.dovepress.com/article/326145)
Supplement: Supplementary file 1 [file get_supplementary_file.php]

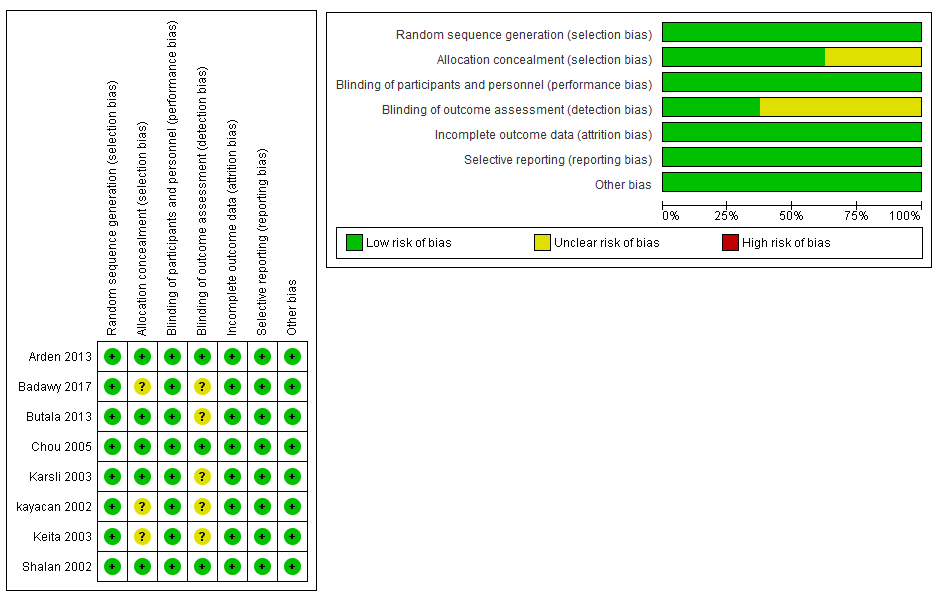


Supplemental File 1: shows an illustration of the individual risks of bias of the included studies.
